# Supplementary material for: Progressive brain changes in schizophrenia related to antipsychotic treatment? A meta-analysis of longitudinal MRI studies
Source: PubMed Central journal article supplement — Neurosci Biobehav Rev. Author manuscript; Available in PMC 2014 Mar 25. (PMC3964856; doi:10.1016/j.neubiorev.2013.06.001), 2013-06-14
Supplement: NIHMS557652-supplement-557652.pdf [file NIHMS557652-supplement-557652.pdf]

## **Supplementary material**

### **S1. Study protocol**

**S2. Supplementary table** The categories scored in the quality assessment

**S3. Supplementary table** The quality assessment of the included studies and the rating of the studies

**S4. Supplementary table** Excluded studies

**S5. Supplementary table** Original doses and treatment duration data from publications, and calculated cumulative doses

**S6. Supplementary table** Included studies with duration of illness and measures of clinical symptoms.

## **S1. Study protocol**

### **1. Why is it important to perform this meta-analysis**

Although it is known that treatment with antipsychotic medication is clinically effective in schizophrenia (i.e. reduced symptoms, relapse rates, etc.) there is no meta-analysis on effects of antipsychotics on human brain structure. Additionally, effects of other potential moderators such as illness duration, illness severity on brain structure, are of the high importance.

### **2. Objectives**

By reviewing longitudinal structural neuroimaging studies, severity of psychotic symptoms, duration of illness, duration and doses of antipsychotic medication on brain structure in patients with schizophrenia were analyzed.

### **3. Electronic searches and data extraction**

We provided a systematic search with terms “MRI”, “neuroimaging”, “psychosis”, “schizophrenia”, “antipsychotic” in a PubMed and Embase until the April 2012. We extracted all relevant variables reported by studies and decided which ones can be used for regression analysis according to the consistency of the data. We extracted author, center, year of publication, sample sizes, gender (proportion of females), mean age of participants, duration of follow-up, duration of illness, type of antipsychotic treatment, daily dose of antipsychotic at the follow-up MRI (chlorpromazine equivalents), previous exposure to antipsychotics, duration of the education, substance abuse, medication with antidepressants, brain volumes of the whole brain and relevant regions, severity of psychotic symptoms (as measured on the Positive and Negative Symptom Scale (PANSS), Brief Psychiatric Rating Scale (BPRS), Scale for Assessment of Positive Symptoms / Scale for Assessment of Negative Symptoms (SAPS/SANS) scores). Afterwards we calculated a random meta-regression mixed model with brain volume as dependent variable and illness severity and/or dose of antipsychotics and/or follow-up duration as independent variables.

#### **4. Inclusion criteria**

We included longitudinal studies of patients treated with antipsychotic medication compared (1) to another type of antipsychotic medication, (2) to the healthy controls, or (3) within the group before and after the antipsychotic medication. To be able to calculate meaningful meta-regression analysis we extended our initial demanding inclusion criteria (only studies reported all depended variables) and included also studies with some missing data. Additionally we included also smaller samples than 10 subjects and performed sensitivity analysis using our quality scores.

#### **5. Types of studies**

We included randomized and non-randomized longitudinal volumetric studies of patients with schizophrenia with or without healthy control groups. We decided to include longitudinal studies only, to test for brain volumetric differences during the period of treatment. Studies used voxel-based morphometry, cortical pattern matching, gray matter density, tractography were not included.

#### **6. Types of participants**

Patients fulfilled the DSM-IV or DSM-III-R criteria for schizophrenia and schizophrenia-like psychoses (schizophreniform and schizoaffective disorders).

Patients were considered as first-episode of schizophrenia (duration of illness no longer than 5 years) or chronic schizophrenia patients. Besides the adult patients' studies we included also childhood-onset of psychosis studies. As control group we considered healthy control when available.

#### **7. Outcome measures**

##### *7.1 Primary outcome*

We extracted volumetric brain changes in schizophrenia patients (outcome measures before and after treatment) as primary outcome. Volumes were extracted in cm<sup>3</sup> or ml as raw data or, when

only relative difference was published, we extracted the p-value and direction of difference for subsequent calculation of longitudinal volumetric changes.

## *7.2. Secondary outcomes*

As secondary outcomes we extracted

- a) Duration of illness at the baseline,
- b) Duration of treatment/follow up,
- c) Measures of clinical symptoms (i.e. positive and negative psychotic symptoms),
- d) Antipsychotic exposure at the beginning and at the end of follow-up period or during the follow-up period.

The dose of antipsychotics was converted in chlorpromazine equivalents using the ‘Antipsychotic dose conversions’ supplementary table by Ho et al (Ho et al., 2011)).

## **8. Data extraction, collection and management**

Studies from the same center with overlap more than 10% were disregarded and we selected the article with the largest sample. When studies did not report data we needed as variables in our analysis, we contacted the respective authors to collect the raw data about brain volume or type/dose of antipsychotic medication and/or become information about the psychometric rating scales. When the relevant raw data were not available in the text, but were plotted on graph in the manuscript, we extracted them using GIMP (a free software for editing and resizing of images)(Mattis and Kimball, 2008).

Brain volumes were extracted as mean and standard deviation from included whole brain or region-of interest studies. For further analysis we included only those regions where at least 3 studies reported volumetric data. Finally we include volumes of the whole brain volume (WBV), gray matter volume (GMV), white matter volume (WMV), lateral ventricle volume (LV), and caudate nucleus volume (Cd, the sum of the left and the right caudate nuclei). When the raw data were not directly available, we added difference in the volumes to the baseline value or extracted the p-values with specified direction. When intracranial volume (ICV) and not WBV were

reported we calculated them as  $WBV=GMV+WMV=ICV-CSF$  (cerebrospinal fluid).

We needed an overall measure of psychotic symptoms change during the follow-up with the studied antipsychotic medication. Most of the included studies (11) reported PANSS containing 30 items with range 0-6. Two studies used BPRS with 18 items and range 1-7 and four studies used SAPS+SANS with 50 items together and range 0-5. To assess illness severity we calculated 'mean per-item score' with baseline zero (Sherwood et al., 2006). When one study reported more than one psychometric measure (e.g. PANSS and BPRS) we decided to include PANSS in the first order and BPRS or SAPS+SANS in the second order. Data reported only part of the psychometric scores or only 'severity ratings' on some of these scores were not compatible with other extracted data and could not be entered into analysis. Because of heterogeneity of the studies and not available raw data from individual studies we could not reliably calculate Z-scores for illness severity. We transformed the total scores to a mean per-item score and calculated a "*percentage of baseline per-item score*" to follow the improvement during the antipsychotic therapy.

Follow-up duration corresponds to the duration between the first and the second scan and is related to the extracted/calculated dose of antipsychotic in chlorpromazine equivalents. Opposite to that the duration of illness relates to the duration of the disease at the baseline (time of the first scan).

Dose of antipsychotic was extracted or calculated from the papers or received as replies from contacted authors. It was afterwards converted into daily chlorpromazine equivalent (Ho et al., 2011). Aiming to follow longitudinal changes associated with the treatment with antipsychotics we extracted or calculated cumulative dose of antipsychotics taken during the follow-up (treatment) period.

## **9. Calculation of the cumulative exposure to antipsychotics**

We used 'Antipsychotic dose conversion table' – equivalency to 100 mg of chlorpromazine per day published by Ho et al. in Supplement Material (Ho et al., 2011) to convert other types of medication to the Chlorpromazine Equivalent per day (CPZ-EQ/d). Afterwards we multiplied the

duration of the medication in days by the maintenance (or mean or stable average) dose in CPZ-EQ/d (e.g. in the study by Gur 1998 (Gur et al., 1998)). When only dose at the follow-up date was reported, we considered 2 weeks at the beginning of the follow-up *either* for titration by antipsychotic-naïve (AN) and/or antipsychotic-free (AF) group *or* for ‘washout- and titration-period’ by subgroup switching from one to another medication. We subtracted these 2 weeks from the treatment/follow-up duration. When the mean dose of antipsychotics was published in a subgroup continuing the same medication, we multiplied the daily dose in CPZ-EQ by duration of treatment/follow-up. Dosages published in Haloperidol-EQ taken during interval (Boonstra et al., 2011; Saijo et al., 2001) were converted according to the Antipsychotic dose conversion table (haloperidol-EQ was converted to the CPZ-EQ). When the included study has not reported the dose of antipsychotics taken during the follow-up period, we searched in other papers published by the same group and reported data from the same population / subpopulation. Thus, searching data for study by Chakos et al. 1994 (Chakos et al., 1994), we extracted the average daily dose in fluphenazine EQ during acute treatment (24 mg, SD=15 mg) from the study by Lieberman et al. (Lieberman et al., 1992). All patients included by Chakos 1994 had remission and stayed on the same doses during the follow-up period. Thus, we converted the dose to the CPZ-EQ/d and multiplied by the duration of the follow-up period in days.

Data reported as mean dose-years at follow-up were converted according to Andreasen et al. (Andreasen et al., 2010). Dose-year formula means that 100 mg/day of CPZ-EQ = 1 dose-year. We thus multiplied dose-years by 100 mg of CPZ-EQ and by 365 (days in 1 year) to become CPZ-EQ cumulative dose during the treatment period in days.

By the study with mostly previously treated patients with the ‘baseline CPZ-EQ/d’ and ‘change in medication dose’ reported, we calculated the dose at the follow-up date and multiplied by the duration of the follow-up in days (without any titration period, as 56% of all included patients were treated previously (James et al., 2004)).

## **10. Assessment of risk of bias in included studies**

The possibility of small publication biases in the present study was examined by visually inspecting funnel plots and applying the regression intercept of Egger (Egger et al., 1997). In this way we assessed whether there was a tendency for selective publication of studies based on the nature and direction of their results. In addition, we used the fail-safe procedure (Orwin, 1983), to generate a number of unpublished studies that would be needed to move estimates to a non significant threshold. In case of publication bias we adopted the ‘trim and fill’ method, which aims both to identify and correct for funnel plot asymmetry arising from publication bias (Duval and Tweedie, 2000).

### **11. Dealing with missing data**

In case of missing data we contacted the corresponding author of each study to collect the requested information (see acknowledgments).

### **12. Assessment of heterogeneity**

Heterogeneity among study point estimates was assessed with the Q statistics (Paulson and Bazemore, 2010) with magnitude of heterogeneity being evaluated with the  $I^2$  index (Lipsey and Wilson, 2000). For homogeneous data, we calculated the global effect size, using a fixed effect model. In the absence of significant heterogeneity, the use of a fixed effect model is legitimate and may provide greater statistical power than the random effect model (Szoke et al., 2008). For heterogeneous data we employed random effects models which are more conservative than fixed-effect models, and appear to better address heterogeneity between studies and study populations, allowing for greater flexibility in parsing effect size variability (Cooper et al., 2009).

### **13. Sensitivity analysis**

To assess the robustness of the results, we performed sensitivity analyses by sequentially removing each study and rerunning the analysis. We also conducted a separate analysis excluding studies with quality ratings in the lowest third to determine if potential methodological weaknesses influenced meta-analytic estimates.

## S2. Supplementary table

The categories scored in the quality assessment and the range according to the reported data.

| Category / range                                                                                                                                                          | 0                                         | 1                           | 2            |
|---------------------------------------------------------------------------------------------------------------------------------------------------------------------------|-------------------------------------------|-----------------------------|--------------|
| Study design                                                                                                                                                              | Case-control                              | Open                        | Random-blind |
| Funding - role in analysis and interpretation of data                                                                                                                     | Company producing studied drug or missing | Could have                  | Non          |
| Sample size *                                                                                                                                                             | >20                                       | 12-20                       | <12          |
| Inclusion criteria                                                                                                                                                        | Not reported                              | Partly reported             | Reported     |
| Exclusion criteria + substance abuse                                                                                                                                      | Not reported                              | Only one reported           | Reported     |
| Control group                                                                                                                                                             | Not included                              | .                           | Included     |
| Gender                                                                                                                                                                    | Not reported                              | .                           | Reported     |
| Race /ethnic origin                                                                                                                                                       | Not reported                              | .                           | Reported     |
| IQ/ educational level                                                                                                                                                     | Not reported                              | Parental education reported | Reported     |
| Duration of illness /age of onset                                                                                                                                         | Not reported                              | .                           | Reported     |
| Previous antipsychotic medication (PAM)                                                                                                                                   | Not defined                               | .                           | Defined      |
| Duration of PAM                                                                                                                                                           | Not defined                               | .                           | Defined      |
| Drop-out rate                                                                                                                                                             | Not reported                              | .                           | Reported     |
| Psychopathology reported                                                                                                                                                  | Not reported                              | .                           | Reported     |
| Threshold reported                                                                                                                                                        | Not reported                              | .                           | Reported     |
| WB: MNI/Tal coor and/or ROI: interrater reliability                                                                                                                       | Not reported                              | .                           | Reported     |
| max 32. <b>high</b> (80-100%) >25, <b>moderate-high</b> (60-79%): 19.5-25, <b>moderate</b> (40-59%): 12.5-19, <b>moderate-low</b> (20-39%): 6.5-12, <b>low</b> (0-19%) <6 |                                           |                             |              |

\* One group >20 + other group <20 (1.5), one group >12 + other group <20 (0.5)

Abbreviations: PAM, previous antipsychotic medication; ROI, region of interest; WB, whole brain



### S3. Supplementary table

The quality assessment of the included studies and the rating of the studies.

| Author Year                                                | Study design | Role of funding | Sample size | Inclusion criteria | Exclusion criteria + substance abuse | Control group | Gender | Race /ethnic origin | IQ/ education | Duration of illness /age of onset | PAM | Duration of PAM | Drop-out rate | Psychopathology | Threshold reported | MNI/Tal and/or ROI reliability | Sum of the scores & category |               |
|------------------------------------------------------------|--------------|-----------------|-------------|--------------------|--------------------------------------|---------------|--------|---------------------|---------------|-----------------------------------|-----|-----------------|---------------|-----------------|--------------------|--------------------------------|------------------------------|---------------|
| Arango 2012(Arango et al., 2012)                           | 1            | 2               | 2           | 2                  | 2                                    | 2             | 2      | 2                   | 1             | 2                                 | 2   | 2               | 2             | 0               | 0                  | 2                              | 24                           | HIGH          |
| Boonstra 2011(Boonstra et al., 2011)                       | 2            | 0               | 0           | 2                  | 1                                    | 2             | 2      | 0                   | 2             | 2                                 | 2   | 0               | 0             | 1               | 0                  | 2                              | 16                           | MODERATE      |
| Chakos 1994(Chakos et al., 1994)                           | 0            | 2               | 1.5         | 2                  | 2                                    | 2             | 2      | 2                   | 0             | 0                                 | 0   | 2               | 0             | 0               | 0                  | 0                              | 15.5                         | MODERATE      |
| Crespo-Facorro 2008(Crespo-Facorro et al., 2008)           | 2            | 2               | 1.5         | 2                  | 2                                    | 2             | 2      | 0                   | 0             | 2                                 | 2   | 2               | 2             | 2               | 0                  | 2                              | 23.5                         | HIGH          |
| DeLisi 2004(DeLisi et al., 2004)                           | 0            | 2               | 2           | 1                  | 0                                    | 2             | 2      | 0                   | 0             | 2                                 | 0   | 0               | 2             | 2               | 0                  | 2                              | 15                           | MODERATE      |
| Frazier 1996(Frazier et al., 1996)                         | 2            | 0               | 0           | 2                  | 0                                    | 2             | 2      | 0                   | 0             | 2                                 | 2   | 2               | 2             | 0               | 0                  | 0                              | 16                           | MODERATE      |
| Garver 2005(Garver et al., 2005)                           | 1            | 0               | 0.5         | 2                  | 2                                    | 2             | 2      | 0                   | 0             | 0                                 | 0   | 0               | 0             | 2               | 0                  | 2                              | 11.5                         | MODERATE      |
| Gur 1998(Gur et al., 1998)                                 | 0            | 0               | 1.5         | 1                  | 1                                    | 2             | 2      | 0                   | 0             | 0                                 | 2   | 2               | 2             | 1               | 0                  | 0                              | 14.5                         | MODERATE      |
| Heitmiller 2004(Heitmiller et al., 2004)                   | 1            | 2               | 1           | 0                  | 0                                    | 2             | 2      | 0                   | 0             | 2                                 | 2   | 0               | 0             | 0               | 0                  | 2                              | 12                           | MODERATE      |
| Ho 2011(Ho et al., 2011)                                   | 1            | 2               | 2           | 2                  | 0                                    | 0             | 2      | 0                   | 0             | 2                                 | 2   | 2               | 2             | 2               | 0                  | 2                              | 19                           | MODERATE-HIGH |
| Ho 2003(Ho et al., 2003)                                   | 1            | 2               | 2           | 0                  | 0                                    | 2             | 2      | 0                   | 0             | 2                                 | 2   | 2               | 0             | 2               | 0                  | 2                              | 17                           | MODERATE      |
| James 2004(James et al., 2004)                             | 0            | 2               | 1           | 2                  | 0                                    | 2             | 2      | 2                   | 0             | 0                                 | 0   | 0               | 0             | 2               | 0                  | 2                              | 13                           | MODERATE      |
| Keshavan 1994(Keshavan et al., 1994)                       | 0            | 0               | 1           | 0                  | 0                                    | 0             | 0      | 0                   | 0             | 2                                 | 2   | 2               | 0             | 0               | 0                  | 0                              | 7                            | MODERATE-LOW  |
| Lang 2004(Lang et al., 2004)                               | 1            | 0               | 1.5         | 0                  | 2                                    | 2             | 2      | 0                   | 0             | 0                                 | 2   | 0               | 2             | 2               | 0                  | 2                              | 14.5                         | MODERATE      |
| Lieberman 2005(Lieberman et al., 2005)                     | 2            | 0               | 2           | 2                  | 2                                    | 2             | 2      | 2                   | 0             | 2                                 | 2   | 2               | 2             | 2               | 2                  | 2                              | 26                           | HIGH          |
| Massana 2005(Massana et al., 2005)                         | 1            | 2               | 0           | 2                  | 0                                    | 0             | 0      | 0                   | 0             | 0                                 | 0   | 0               | 0             | 0               | 2                  | 2                              | 7                            | MODERATE-LOW  |
| McClure 2008(McClure et al., 2008)                         | 0            | 1               | 0           | 2                  | 2                                    | 1             | 2      | 2                   | 2             | 2                                 | 2   | 2               | 0             | 0               | 2                  | 2                              | 20                           | MODERATE-HIGH |
| Molina 2005(Molina et al., 2005)                           | 0            | 2               | 1.5         | 2                  | 2                                    | 2             | 2      | 2                   | 0             | 0                                 | 1   | 1               | 0             | 2               | 0                  | 2                              | 17.5                         | MODERATE-HIGH |
| Nakamura 2007(Nakamura et al., 2007)                       | 0            | 2               | 1.5         | 2                  | 2                                    | 2             | 2      | 0                   | 2             | 0                                 | 2   | 2               | 0             | 2               | 0                  | 2                              | 19.5                         | MODERATE-HIGH |
| Puri 2001(Puri et al., 2001)                               | 0            | 2               | 1.5         | 0                  | 0                                    | 2             | 0      | 0                   | 0             | 2                                 | 2   | 2               | 0             | 0               | 2                  | 0                              | 13.5                         | MODERATE      |
| Reig 2009(Reig et al., 2009)                               | 0            | 2               | 2           | 2                  | 2                                    | 2             | 2      | 2                   | 2             | 2                                 | 2   | 2               | 2             | 2               | 0                  | 2                              | 26                           | HIGH          |
| Saijo 2001(Saijo et al., 2001)                             | 0            | 2               | 1           | 2                  | 2                                    | 2             | 2      | 0                   | 2             | 2                                 | 0   | 0               | 0             | 0               | 0                  | 2                              | 15                           | MODERATE      |
| Scheepers 2001(Scheepers et al., 2001)                     | 0            | 0               | 2           | 2                  | 2                                    | 0             | 2      | 0                   | 0             | 2                                 | 1   | 2               | 2             | 0               | 0                  | 2                              | 15                           | MODERATE      |
| Sporn 2003(Sporn et al., 2003)                             | 0            | 0               | 2           | 2                  | 2                                    | 2             | 2      | 2                   | 0             | 0                                 | 2   | 0               | 0             | 2               | 0                  | 2                              | 16                           | MODERATE      |
| Takahashi 2009(Takahashi et al., 2009)                     | 0            | 2               | 1.5         | 2                  | 2                                    | 2             | 2      | 0                   | 2             | 2                                 | 2   | 2               | 0             | 2               | 0                  | 2                              | 21.5                         | MODERATE-HIGH |
| Tauscher-Wisniewski 2005(Tauscher-Wisniewski et al., 2005) | 0            | 0               | 1.5         | 0                  | 0                                    | 2             | 0      | 0                   | 0             | 2                                 | 2   | 0               | 0             | 0               | 0                  | 2                              | 7.5                          | MODERATE-LOW  |
| Tauscher-Wisniewski 2002(Tauscher-Wisniewski et al., 2002) | 1            | 0               | 1           | 0                  | 0                                    | 2             | 2      | 0                   | 0             | 0                                 | 2   | 2               | 0             | 0               | 0                  | 2                              | 10                           | MODERATE-LOW  |

|                                        |   |   |   |   |   |   |   |   |   |   |   |   |   |   |   |   |    |               |  |
|----------------------------------------|---|---|---|---|---|---|---|---|---|---|---|---|---|---|---|---|----|---------------|--|
| al., 2002)                             |   |   |   |   |   |   |   |   |   |   |   |   |   |   |   |   |    |               |  |
| Taylor 2005(Taylor et al., 2005)       | 0 | 2 | 0 | 2 | 2 | 2 | 0 | 0 | 0 | 1 | 0 | 0 | 0 | 2 | 0 | 2 | 11 | MODERATE      |  |
| van Haren 2008(van Haren et al., 2008) | 1 | 0 | 2 | 0 | 0 | 2 | 2 | 0 | 2 | 2 | 0 | 0 | 2 | 1 | 0 | 2 | 14 | MODERATE      |  |
| Whitworth 2005(Whitworth et al., 2005) | 0 | 0 | 2 | 1 | 0 | 2 | 2 | 2 | 0 | 2 | 1 | 0 | 1 | 2 | 0 | 2 | 15 | MODERATE-HIGH |  |

Abbreviations: PAM, previous antipsychotic medication; ROI, region of interest

#### S4. Supplementary table

Excluded studies which full text was inspected and the reason why they were excluded.

| Author & Year        | Reason why excluded                 |
|----------------------|-------------------------------------|
| Arango 2008          | Cross-sectional study               |
| Bakalar 2009         | Cortical thickness                  |
| Cahn 2002            | Overlap with van Haren 2008         |
| Cahn 2009            | Overlap with van Haren 2008         |
| Chakos 1995          | Overlap with Chakos 1994            |
| Christensen 2004     | Overlap with Garver 2005            |
| Corson 1999          | Overlap with Heitmiller 2004        |
| Crespo-Facorro 2004  | No relevant regions                 |
| Dazzan 2005          | Cross-sectional study, VBM          |
| DeLisi 2005          | No relevant regions - only STG      |
| DeLisi 1997          | Overlap with De Lisi 2004           |
| Douaud 2009          | VBM                                 |
| Ehrlich 2011         | Cross-sectional study               |
| Girgis 2006          | VBM                                 |
| Gogtay 2004          | Overlap with Sporn 2003             |
| Gur 1998             | Cross-sectional study               |
| James 2002           | Overlap with James 2004             |
| Kasai 2003           | No relevant regions + MEDI + DOI    |
| Keshavan 1998        | Cross-sectional study               |
| Lang 2001            | Cross-sectional study               |
| Lieberman 2001       | Overlap with Lieberman 2005         |
| Mathalon 2001        | ICV, no WBV + MEDI                  |
| McClure 2006         | Overlap with McClure 2008           |
| McCormick 2005       | No relevant regions                 |
| Nair 1997            | No relevant regions                 |
| Pressler 2005        | No relevant regions                 |
| Rapoport 1999 & 1997 | Overlap with Sporn 2003             |
| Stip 2008            | GMD + MEDI                          |
| Theberge 2007        | VBM                                 |
| Thompson 2009        | Overlap with Lieberman 2005         |
| van Haren 2007       | Overlap with Haren 2008 + VBM       |
| Vidal 2006           | Gray and white matter cortical maps |
| Whitford 2006        | VBM                                 |
| Wood 2001            | Overlap with Takahashi 2009         |

## S5. Supplementary table

Included studies with treatment duration, original dose, and calculated cumulative doses in chlorpromazine equivalents.

| Author & Year                                    | Type of antipsychotic | Schizophrenia patients N + subgroups | Length of treatment in weeks | SD - length of treatment in weeks | Daily CPZ Eq. | SD - daily CPZ Eq. | Cumulative CPZ Eq. during the interval between MRIs (10 <sup>3</sup> units) | SD -cumulative CPZ Eq. |
|--------------------------------------------------|-----------------------|--------------------------------------|------------------------------|-----------------------------------|---------------|--------------------|-----------------------------------------------------------------------------|------------------------|
| Arango 2012(Arango et al., 2012)                 | MIX                   | 25                                   | 104.80                       | 12.00                             | 209.18        | NA                 | 168.57                                                                      | 90011                  |
| Boonstra 2011(Boonstra et al., 2011)             | ATYP                  | 8 FE AF                              | 57.27                        | 8.55                              | 190.20        | NA                 | 62.87                                                                       | NA                     |
|                                                  | ATYP                  | 8 FE                                 | 54.00                        | 0.84                              | 176.60        | NA                 | 29.75                                                                       | NA                     |
| Chakos 1994(Chakos et al., 1994)                 | TYP                   | 29                                   | 72.00                        | NA                                | 1363.63       | NA                 | 687.27                                                                      | NA                     |
| Crespo-Facorro 2008(Crespo-Facorro et al., 2008) | TYP                   | 18 Hal                               | 54.60                        | 4.60                              | 244.09        | NA                 | 11.68                                                                       | NA                     |
|                                                  | ATYP                  | 18 Olan                              | 55.30                        | 4.20                              | 289.02        | NA                 | 14.04                                                                       | NA                     |
|                                                  | ATYP                  | 16 Risp                              | 53.70                        | 3.50                              | 183.65        | NA                 | 8.63                                                                        | NA                     |
| DeLisi 2004(DeLisi et al., 2004)                 | MIX                   | 26                                   | 520.00                       | NA                                | .             | .                  | .                                                                           | .                      |
| Frazier 1996(Frazier et al., 1996)               | CLOZ/MIX              | 8                                    | 104.00                       | NA                                | 377.00        | NA                 | 269.18                                                                      | NA                     |
| Garver 2005(Garver et al., 2005)                 | TYP                   | 6                                    | 4.00                         | NA                                | 760.00        | NA                 | 21.28                                                                       | NA                     |
|                                                  | ATYP                  | 13                                   | 4.00                         | NA                                | 272.80        | NA                 | 7.64                                                                        | NA                     |
| Gur 1998(Gur et al., 1998)                       | MIX                   | 20 FE                                | 69.60                        | 32.40                             | 259.90        | 165.6              | 126.62                                                                      | NA                     |
|                                                  | MIX                   | 20 Ch                                | 78.80                        | 56.40                             | 515.30        | 224.00             | 284.24                                                                      | NA                     |
| Heitmiller 2004(Heitmiller et al., 2004)         | ATYP                  | 14                                   | 120.80                       | NA                                | 297.32        | NA                 | 269.37                                                                      | NA                     |
| Ho 2011(Ho et al., 2011)                         | MIX                   | 211                                  | 374.40                       | 202.80                            | 91.65         | 220.45             | 240.19                                                                      | NA                     |
| Ho 2003(Ho et al., 2003)                         | MIX                   | 73                                   | 171.00                       | 83.20                             | 462.20        | NA                 | 556.12                                                                      | 494284.50              |
| James 2004(James et al., 2004)                   | CLOZ/ATYP             | 9 M                                  | 130.00                       | NA                                | 175.00        | NA                 | 159.25                                                                      | NA                     |
|                                                  | CLOZ/ATYP             | 7 F                                  | 130.00                       | NA                                | 140.00        | NA                 | 127.40                                                                      | NA                     |
| Keshavan 1994(Keshavan et al., 1994)             | TYP                   | 11                                   | 43.57                        | NA                                | 121.80        | NA                 | 37.15                                                                       | NA                     |
| Lang 2004(Lang et al., 2004)                     | ATYP                  | 10                                   | 56.00                        | 17.10                             | 170.00        | 64.00              | 64.26                                                                       | NA                     |
|                                                  | ATYP                  | 14                                   | 52.10                        | 6.90                              | 84.00         | 52.00              | 30.63                                                                       | NA                     |
|                                                  | ATYP                  | 13                                   | 42.20                        | 12.10                             | 150.00        | 10.70              | 42.21                                                                       | NA                     |
| Lieberman 2005(Lieberman et al., 2005)           | TYP                   | 79                                   | 52.00                        | NA                                | 202.70        | NA                 | 73.78                                                                       | NA                     |
|                                                  | ATYP                  | 82                                   | 52.00                        | NA                                | 250.00        | NA                 | 91.00                                                                       | NA                     |
| Massana 2005(Massana et al.,                     | ATYP                  | 11                                   | 9.00                         | NA                                | 458.33        | NA                 | 28.87                                                                       | NA                     |

|                                                            |           |       |        |       |         |        |         |    |
|------------------------------------------------------------|-----------|-------|--------|-------|---------|--------|---------|----|
| 2005)                                                      |           |       |        |       |         |        |         |    |
| McClure 2008(McClure et al., 2008)                         | ATYP/CLOZ | 10    | 12.00  | NA    | 534.10  | NA     | 37.39   | NA |
| Molina 2005(Molina et al., 2005)                           | ATYP      | 49    | 102.40 | 39.60 | 378.80  | 151.5  | 266.22  | NA |
|                                                            | CLOZ      | 29Ch  | 114.80 | 47.20 | 240.70  | 204.6  | 190.06  | NA |
| Nakamura 2007(Nakamura et al., 2007)                       | ATYP      | 17 FE | 72.40  | 46.40 | 252.00  | NA     | 124.19  | NA |
| Puri 2001(Puri et al., 2001)                               | MIX       | 24    | 22.69  | NA    | 388.39  | NA     | 61.69   | NA |
| Reig 2009(Reig et al., 2009)                               | CLOZ/ATYP | 21    | 104.00 | NA    | .       | .      | .       | .  |
| Saijo 2001(Saijo et al., 2001)                             | TYP       | 18    | 520.00 | NA    | 2255.40 | NA     | 8178.08 | NA |
| Scheepers 2001(Scheepers et al., 2001)                     | CLOZ      | 29    | 24.00  | NA    | 320.00  | NA     | 49.28   | NA |
| Sporn 2003(Sporn et al., 2003)                             | MIX       | 39    | 176.80 | 72.80 | 384.26  | NA     | 470.18  | NA |
| Takahashi 2009(Takahashi et al., 2009)                     | MIX       | 23 FE | 105.04 | 39.52 | 193.50  | 198.9  | 139.57  | NA |
|                                                            | MIX       | 11Ch  | 125.32 | 50.44 | 626.00  | NA     | 540.39  | NA |
| Tauscher-Wisniewski 2005(Tauscher-Wisniewski et al., 2005) | ATYP      | 14    | 12.00  | NA    | 347.89  | NA     | 24.35   | NA |
| Tauscher-Wisniewski 2002(Tauscher-Wisniewski et al., 2002) | MIX       | 15    | 260.00 | NA    | 353.33  | NA     | 638.11  | NA |
| Taylor 2005(Taylor et al., 2005)                           | MIX       | 11    | 4.00   | .     | .       | .      | .       | .  |
| van Haren 2008(van Haren et al., 2008)                     | MIX       | 96    | 260.00 | NA    | 338.68  | 156.92 | 611.66  | NA |
| Whitworth 2005(Whitworth et al., 2005)                     | MIX       | 21 FE | 132.10 | 41.60 | .       | .      | .       | .  |
|                                                            | MIX       | 17Ch  | 171.10 | 63.40 | .       | .      | .       | .  |

. missing data

Abbreviations: AF, antipsychotic free; ATYP, atypical antipsychotic, CLOZ, clozapine; Ch, chronic; CPZ Eq., chlorpromazine equivalent; F, female; FE, first episode; GM, gray matter; Hal, haloperidol; M, male; MIX, both typical and atypical antipsychotics; N, amount of individuals; NA, not announced; Ola, olanzapine; Ris, risperidone; TYP, typical antipsychotic.



|                                                            |       |                 |                |               |               |              |             |            |      |      |    |
|------------------------------------------------------------|-------|-----------------|----------------|---------------|---------------|--------------|-------------|------------|------|------|----|
| McClure 2008(McClure et al., 2008)                         | 10    | 551.20 (NA)     | .              | .             | .             | .            | .           | .          | .    | .    | .  |
| Molina 2005(Molina et al., 2005)                           | 49    | 119.60 (5.60)   | .              | .             | .             | .            | 61.30 (NA)  | 52.50 (NA) | 1.23 | 1.05 | 86 |
|                                                            | 29Ch  | 395.20 (208.00) | .              | .             | .             | .            | 68.00 (NA)  | 38.10 (NA) | 1.36 | 0.76 | 56 |
| Nakamura 2007(Nakamura et al., 2007)                       | 17 FE | 3 (NA)          | .              | .             | 41.50 (13.70) | 27.80 (6.70) | .           | .          | 1.31 | 0.54 | 42 |
| Puri 2001(Puri et al., 2001)                               | 24    | 59.69 (94.22)   | .              | .             | .             | .            | .           | .          | .    | .    | .  |
| Reig 2009(Reig et al., 2009)                               | 21    | 12.80 (12.00)   | 86.90 (18.40)  | 58.30 (16.20) | .             | .            | .           | .          | 1.90 | 0.94 | 50 |
| Saijo 2001(Saijo et al., 2001)                             | 18    | 785.20 (301.60) | .              | .             | .             | .            | .           | .          | .    | .    | .  |
| Scheepers 2001(Scheepers et al., 2001)                     | 29    | 638.00 (456.40) | 78.00 (NA)     | 61.00 (NA)    | .             | .            | .           | .          | 1.60 | 1.03 | 65 |
| Sporn 2003(Sporn et al., 2003)                             | 39    | 239.20 (104.00) | .              | .             | .             | .            | 103.10 (NA) | 61.40 (NA) | 2.06 | 1.23 | 60 |
| Takahashi 2009(Takahashi et al., 2009)                     | 23 FE | 9.36 (14.56)    | 84.80 (NA)     | 80.00 (NA)    | .             | .            | .           | .          | 1.83 | 1.67 | 91 |
|                                                            | 11Ch  | 624.00 (361.90) | 76.20 (NA)     | 64.60 (NA)    | .             | .            | .           | .          | 1.54 | 1.15 | 75 |
| Tauscher-Wisniewski 2005(Tauscher-Wisniewski et al., 2005) | 14    | 59.60 (71.20)   | 82.60 (7.90)   | 54.50 (9.90)  | .             | .            | .           | .          | 1.75 | 0.82 | 47 |
| Tauscher-Wisniewski 2002(Tauscher-Wisniewski et al., 2002) | 15    | .               | .              | .             | .             | .            | .           | .          | .    | .    | .  |
| Taylor 2005(Taylor et al., 2005)                           | 11    | .               | .              | .             | .             | .            | .           | .          | .    | .    | .  |
| van Haren 2008(van Haren et al., 2008)                     | 96    | 569.40 (532.00) | 70.81 (16.40)  | 53.71 (16.26) | .             | .            | .           | .          | 1.36 | 0.79 | 58 |
| Whitworth 2005(Whitworth et al., 2005)                     | 21 FE | 33.20 (70.80)   | 122.90 (21.39) | 62.76 (24.17) | .             | .            | .           | .          | 3.10 | 1.09 | 35 |
|                                                            | 17Ch  | 374.80 (290.40) | 115.06 (33.85) | 66.50 (17.19) | .             | .            | .           | .          | 2.84 | 1.22 | 43 |

\* Published the severity ratings on the SANS and SAPS

. missing data

Abbreviations: AF, antipsychotic free; BPRS, Brief Psychiatric Rating Scale; Ch, chronic; DOI, duration of illness at the baseline; F, female; FE, first episode; Hal, haloperidol; M, male; MIX, both typical and atypical antipsychotics; NA, not announced; Ola, olanzapine; PANSS, Positive and Negative Symptom Scale; Ris, risperidone; SAPS, Scale for Assessment of Positive Symptoms; SANS, Scale for Assessment of Negative Symptoms; SCZ N, number of schizophrenia patients; SD, standard deviation.

## REFERENCES

- Andreasen, N.C., Pressler, M., Nopoulos, P., Miller, D., Ho, B.C., 2010. Antipsychotic dose equivalents and dose-years: a standardized method for comparing exposure to different drugs. *Biol Psychiatry* 67, 255-262.
- Arango, C., Rapado-Castro, M., Reig, S., Castro-Fornieles, J., González-Pinto, A., Otero, S., Baeza, I., Moreno, C., Graell, M., Janssen, J., Parellada, M., Moreno, D., Bargalló, N., Desco, M., 2012. Progressive brain changes in children and adolescents with first-episode psychosis. *Arch Gen Psychiatry* 69, 16-26.
- Boonstra, G., van Haren, N.E., Schnack, H.G., Cahn, W., Burger, H., Boersma, M., de Kroon, B., Grobbee, D.E., Hulshoff Pol, H.E., Kahn, R.S., 2011. Brain volume changes after withdrawal of atypical antipsychotics in patients with first-episode schizophrenia. *J Clin Psychopharmacol* 31, 146-153.
- Chakos, M.H., Lieberman, J.A., Bilder, R.M., Borenstein, M., Lerner, G., Bogerts, B., Wu, H., Kinon, B., Ashtari, M., 1994. Increase in caudate nuclei volumes of first-episode schizophrenic patients taking antipsychotic drugs. *Am J Psychiatry* 151, 1430-1436.
- Cooper, H., Hedges, L., Valentine, J., 2009. *Handbook of Research Synthesis and Meta-Analysis*. Russell Sage Foundation, New York.
- Crespo-Facorro, B., Roiz-Santiáñez, R., Pérez-Iglesias, R., Pelayo-Terán, J.M., Rodríguez-Sánchez, J.M., Tordesillas-Gutiérrez, D., Ramírez, M., Martínez, O., Gutiérrez, A., de Lucas, E.M., Vázquez-Barquero, J.L., 2008. Effect of antipsychotic drugs on brain morphometry. A randomized controlled one-year follow-up study of haloperidol, risperidone and olanzapine. *Prog Neuropsychopharmacol Biol Psychiatry* 32, 1936-1943.
- DeLisi, L.E., Sakuma, M., Maurizio, A.M., Relja, M., Hoff, A.L., 2004. Cerebral ventricular change over the first 10 years after the onset of schizophrenia. *Psychiatry Res* 130, 57-70.
- Duval, S., Tweedie, R., 2000. Trim and fill: A simple funnel-plot-based method of testing and adjusting for publication bias in meta-analysis. *Biometrics* 56, 455-463.
- Egger, M., Davey Smith, G., Schneider, M., Minder, C., 1997. Bias in meta-analysis detected by a simple, graphical test. *BMJ* 315, 629-634.
- Frazier, J.A., Giedd, J.N., Kaysen, D., Albus, K., Hamburger, S., Alaghband-Rad, J., Lenane, M.C., McKenna, K., Breier, A., Rapoport, J.L., 1996. Childhood-onset schizophrenia: brain MRI rescan after 2 years of clozapine maintenance treatment. *Am J Psychiatry* 153, 564-566.
- Garver, D.L., Holcomb, J.A., Christensen, J.D., 2005. Cerebral cortical gray expansion associated with two second-generation antipsychotics. *Biol Psychiatry* 58, 62-66.
- Gur, R.E., Cowell, P., Turetsky, B.I., Gallacher, F., Cannon, T., Bilker, W., Gur, R.C., 1998. A follow-up magnetic resonance imaging study of schizophrenia. Relationship of neuroanatomical changes to clinical and neurobehavioral measures. *Arch Gen Psychiatry* 55, 145-152.
- Heitmiller, D.R., Nopoulos, P.C., Andreasen, N.C., 2004. Changes in caudate volume after exposure to atypical neuroleptics in patients with schizophrenia may be sex-dependent. *Schizophr Res* 66, 137-142.
- Ho, B.C., Andreasen, N.C., Nopoulos, P., Arndt, S., Magnotta, V., Flaum, M., 2003. Progressive structural brain abnormalities and their relationship to clinical outcome: a longitudinal magnetic resonance imaging study early in schizophrenia. *Arch Gen Psychiatry* 60, 585-594.
- Ho, B.C., Andreasen, N.C., Ziebell, S., Pierson, R., Magnotta, V., 2011. Long-term antipsychotic treatment and brain volumes: a longitudinal study of first-episode schizophrenia. *Arch Gen Psychiatry* 68, 128-137.



James, A.C., James, S., Smith, D.M., Javaloyes, A., 2004. Cerebellar, prefrontal cortex, and thalamic volumes over two time points in adolescent-onset schizophrenia. *Am J Psychiatry* 161, 1023-1029.

Keshavan, M.S., Bagwell, W.W., Haas, G.L., Sweeney, J.A., Schooler, N.R., Pettegrew, J.W., 1994. Changes in caudate volume with neuroleptic treatment. *Lancet* 344, 1434.

Lang, D.J., Kopala, L.C., Vandorpe, R.A., Rui, Q., Smith, G.N., Goghari, V.M., Lapointe, J.S., Honer, W.G., 2004. Reduced basal ganglia volumes after switching to olanzapine in chronically treated patients with schizophrenia. *Am J Psychiatry* 161, 1829-1836.

Lieberman, J.A., Alvir, J.M., Woerner, M., Degreef, G., Bilder, R.M., Ashtari, M., Bogerts, B., Mayerhoff, D.I., Geisler, S.H., Loebel, A., et al., 1992. Prospective study of psychobiology in first-episode schizophrenia at Hillside Hospital. *Schizophr Bull* 18, 351-371.

Lieberman, J.A., Tollefson, G.D., Charles, C., Zipursky, R., Sharma, T., Kahn, R.S., Keefe, R.S., Green, A.I., Gur, R.E., McEvoy, J., Perkins, D., Hamer, R.M., Gu, H., Tohen, M., Group, H.S., 2005. Antipsychotic drug effects on brain morphology in first-episode psychosis. *Arch Gen Psychiatry* 62, 361-370.

Lipsey, M., Wilson, D., 2000. *Practical Meta-analysis*. Sage Publications, Thousand Oaks, CA.

Massana, G., Salgado-Pineda, P., Junqué, C., Pérez, M., Baeza, I., Pons, A., Massana, J., Navarro, V., Blanch, J., Morer, A., Mercader, J.M., Bernardo, M., 2005. Volume changes in gray matter in first-episode neuroleptic-naive schizophrenic patients treated with risperidone. *J Clin Psychopharmacol* 25, 111-117.

Mattis, P., Kimball, S., 2008. Gimp, the GNU image manipulation program.

McClure, R.K., Carew, K., Greeter, S., Maushauer, E., Steen, G., Weinberger, D.R., 2008. Absence of regional brain volume change in schizophrenia associated with short-term atypical antipsychotic treatment. *Schizophr Res* 98, 29-39.

Molina, V., Reig, S., Sanz, J., Palomo, T., Benito, C., Sánchez, J., Sarramea, F., Pascau, J., Desco, M., 2005. Increase in gray matter and decrease in white matter volumes in the cortex during treatment with atypical neuroleptics in schizophrenia. *Schizophr Res* 80, 61-71.

Nakamura, M., Salisbury, D.F., Hirayasu, Y., Bouix, S., Pohl, K.M., Yoshida, T., Koo, M.S., Shenton, M.E., McCarley, R.W., 2007. Neocortical gray matter volume in first-episode schizophrenia and first-episode affective psychosis: a cross-sectional and longitudinal MRI study. *Biol Psychiatry* 62, 773-783.

Orwin, R., 1983. A fail-safe N for effect size in meta-analysis. *J Edu Stat* 8, 157-159.

Paulson, J.F., Bazemore, S.D., 2010. Prenatal and postpartum depression in fathers and its association with maternal depression: a meta-analysis. *JAMA* 303, 1961-1969.

Puri, B.K., Hutton, S.B., Saeed, N., Oatridge, A., Hajnal, J.V., Duncan, L., Chapman, M.J., Barnes, T.R., Bydder, G.M., Joyce, E.M., 2001. A serial longitudinal quantitative MRI study of cerebral changes in first-episode schizophrenia using image segmentation and subvoxel registration. *Psychiatry Res* 106, 141-150.

Reig, S., Moreno, C., Moreno, D., Burdalo, M., Janssen, J., Parellada, M., Zabala, A., Desco, M., Arango, C., 2009. Progression of brain volume changes in adolescent-onset psychosis. *Schizophr Bull* 35, 233-243.

Saijo, T., Abe, T., Someya, Y., Sassa, T., Sudo, Y., Suhara, T., Shuno, T., Asai, K., Okubo, Y., 2001. Ten year progressive ventricular enlargement in schizophrenia: an MRI morphometrical study. *Psychiatry Clin Neurosci* 55, 41-47.

Scheepers, F.E., de Wied, C.C., Hulshoff Pol, H.E., van de Flier, W., van der Linden, J.A., Kahn, R.S., 2001. The effect of clozapine on caudate nucleus volume in schizophrenic patients previously treated with typical antipsychotics. *Neuropsychopharmacology* 24, 47-54.

Sherwood, M., Thornton, A.E., Honer, W.G., 2006. A meta-analysis of profile and time-course of symptom change in acute schizophrenia treated with atypical antipsychotics. *Int J Neuropsychopharmacol* 9, 357-366.

Sporn, A.L., Greenstein, D.K., Gogtay, N., Jeffries, N.O., Lenane, M., Gochman, P., Clasen, L.S., Blumenthal, J., Giedd, J.N., Rapoport, J.L., 2003. Progressive brain volume loss during adolescence in childhood-onset schizophrenia. *Am J Psychiatry* 160, 2181-2189.

Szoke, A., Trandafir, A., Dupont, M.E., Meary, A., Schurhoff, F., Leboyer, M., 2008. Longitudinal studies of cognition in schizophrenia: meta-analysis. *Br J Psychiatry* 192, 248-257.

Takahashi, T., Wood, S.J., Soulsby, B., McGorry, P.D., Tanino, R., Suzuki, M., Velakoulis, D., Pantelis, C., 2009. Follow-up MRI study of the insular cortex in first-episode psychosis and chronic schizophrenia. *Schizophr Res* 108, 49-56.

Tauscher-Wisniewski, S., Tauscher, J., Christensen, B.K., Mikulis, D.J., Zipursky, R.B., 2005. Volumetric MRI measurement of caudate nuclei in antipsychotic-naive patients suffering from a first episode of psychosis. *J Psychiatr Res* 39, 365-370.

Tauscher-Wisniewski, S., Tauscher, J., Logan, J., Christensen, B.K., Mikulis, D.J., Zipursky, R.B., 2002. Caudate volume changes in first episode psychosis parallel the effects of normal aging: a 5-year follow-up study. *Schizophr Res* 58, 185-188.

Taylor, S., Christensen, J.D., Holcomb, J.M., Garver, D.L., 2005. Volume increases in striatum associated with positive symptom reduction in schizophrenia: a preliminary observation. *Psychiatry Res* 140, 85-89.

van Haren, N.E., Hulshoff Pol, H.E., Schnack, H.G., Cahn, W., Brans, R., Carati, I., Rais, M., Kahn, R.S., 2008. Progressive brain volume loss in schizophrenia over the course of the illness: evidence of maturational abnormalities in early adulthood. *Biol Psychiatry* 63, 106-113.

Whitworth, A.B., Kemmler, G., Honeder, M., Kremser, C., Felber, S., Hausmann, A., Walch, T., Wanko, C., Weiss, E.M., Stuppaeck, C.H., Fleischhacker, W.W., 2005. Longitudinal volumetric MRI study in first- and multiple-episode male schizophrenia patients. *Psychiatry Res* 140, 225-237.
